# Supplementary material for: Histidine‐Functionalized Diblock Copolymer Nanoparticles Exhibit Enhanced Adsorption onto Planar Stainless Steel
Source: PubMed Central journal article supplement — Macromol Rapid Commun. 2023 Jan 9;44(16):2200903. doi: 10.1002/marc.202200903 (PMC11497266; doi:10.1002/marc.202200903), 2023-01-09
Supplement: MARC-44-2200903-s001.pdf [file MARC-44-2200903-s001.pdf]

**[M]**acro-  
**[M]**olecular  
Rapid Communications

Supporting Information

for *Macromol. Rapid Commun.*, DOI 10.1002/marc.202200903

Histidine-Functionalized Diblock Copolymer Nanoparticles Exhibit Enhanced Adsorption onto Planar Stainless Steel

*Emma E. Brotherton, Daniel Josland, Csilla György, Edwin C. Johnson, Derek H.H. Chan, Mark J. Smallridge and Steven P. Armes\**

**Supporting Information for:**  
***Histidine-Functionalized Diblock Copolymer Nanoparticles***  
***Exhibit Enhanced Adsorption onto Planar Stainless Steel***

Emma E. Brotherton<sup>a</sup>, Daniel Josland<sup>a</sup>, Csilla Gyorgy<sup>a</sup>,  
Edwin C. Johnson<sup>a</sup>, Derek H. H. Chan<sup>a</sup>, Mark J. Smallridge<sup>b</sup> and Steven P. Armes<sup>a,\*</sup>

a. Dainton Building, Department of Chemistry, The University of Sheffield,  
Brook Hill, Sheffield, South Yorkshire, S3 7HF, UK.

b. GEO Specialty Chemicals, Hythe, Southampton, Hampshire SO45 3ZG, UK.

**Summary of Schemes and Figures**

**Scheme S1.** (a) Two-step synthesis of GEO5MA monomer.

**Scheme S2.** Synthesis of PGEO5MA<sub>46</sub> by RAFT solution polymerization in ethanol.

**Figure S1.** <sup>1</sup>H NMR spectrum recorded for PGEO5MA<sub>46</sub> homopolymer.

**Figure S2.** <sup>1</sup>H NMR spectrum recorded for PGEO5MA<sub>46</sub>-PIPGMA<sub>1000</sub>.

**Figure S3.** DMF GPC curves for a series of PGEO5MA<sub>46</sub>-PIPGMA<sub>y</sub> nanoparticles (y = 500–2000).

**Figure S4.** Z-average diameter vs. PIPGMA DP determined by DLS studies of a series of PGEO5MA<sub>46</sub>-PIPGMA<sub>y</sub> nanoparticles.

**Figure S5.** <sup>1</sup>H NMR spectra recorded for (a) PAGEO5MA<sub>46</sub>-PIPGMA<sub>500</sub> and (b) PHisGEO5MA<sub>46</sub>-PIPGMA<sub>500</sub>.

**Figure S6.** TEM images recorded for (a) PAGEO5MA<sub>46</sub>-PIPGMA<sub>500</sub>, (b) PAGEO5MA<sub>46</sub>-PIPGMA<sub>1000</sub>, (c) PHisGEO5MA<sub>46</sub>-PIPGMA<sub>500</sub> and (d) PHisGEO5MA<sub>46</sub>-PIPGMA<sub>1000</sub> nanoparticles.

**Figure S7.** Digital image analysis of an SEM image of PHisGEO5MA<sub>46</sub>-PIPGMA<sub>1000</sub> nanoparticles adsorbed onto stainless steel using ImageJ software suggests a fractional surface coverage,  $\theta$ , of 0.23.

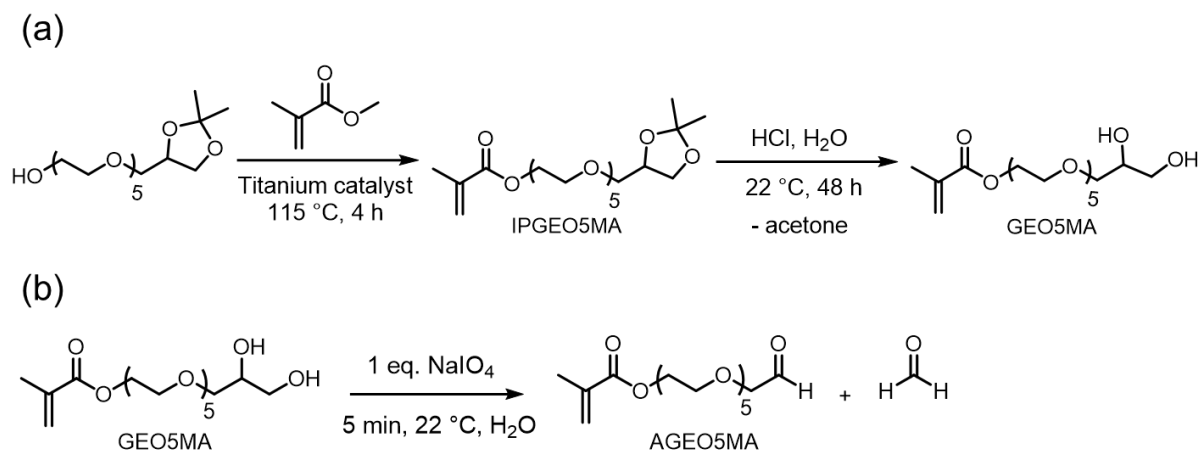

**Scheme S1.** (a) Two-step synthesis of GEO5MA monomer. The hydroxyl-capped oligo(ethylene glycol) isopropylidene glycerol precursor is transesterified with methyl methacrylate to produce IPGEO5MA, before removing the ketal protecting group with acid to afford GEO5MA monomer. (b) Selective oxidation of GEO5MA in aqueous solution using sodium periodate at 22 °C affords AGEO5MA with formaldehyde as a by-product. The same selective oxidation can be used to convert PGE05MA homopolymer into PAGE05MA homopolymer using identical reaction conditions.

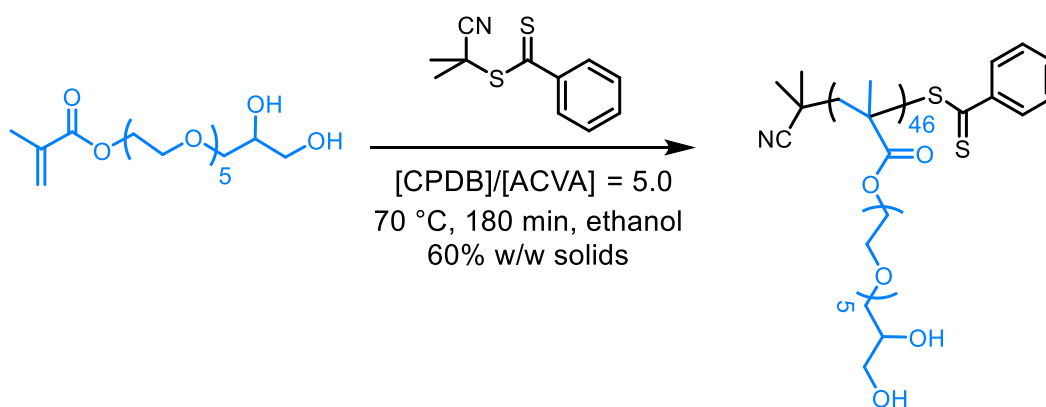

**Scheme S2.** Synthesis of PGEO5MA<sub>46</sub> precursor by RAFT solution polymerization of GEO5MA in ethanol.

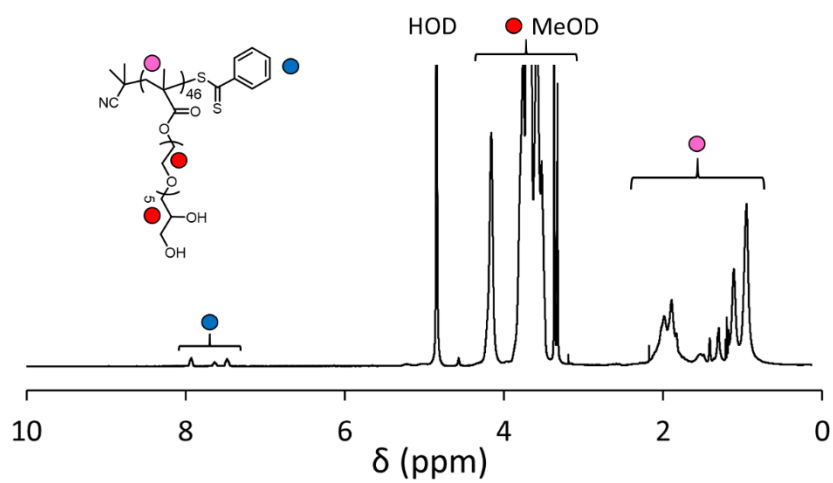

**Figure S1.** <sup>1</sup>H NMR (*d*<sub>4</sub>-methanol) spectrum for PGEO5MA<sub>46</sub>. Integration of the aromatic protons assigned to the end-group indicates a mean degree of polymerization of 46.

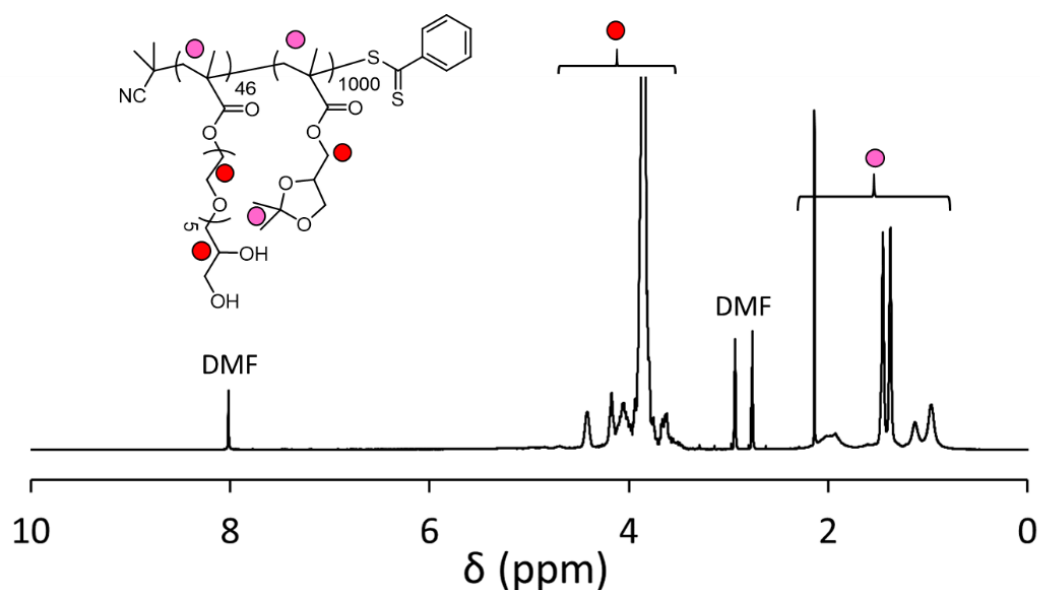

**Figure S2.**  $^1\text{H}$  NMR ( $d_7$ -DMF) spectrum recorded for PGE05MA<sub>46</sub>-PIPGMA<sub>1000</sub>. This spectrum was used to calculate the mean diblock copolymer composition.

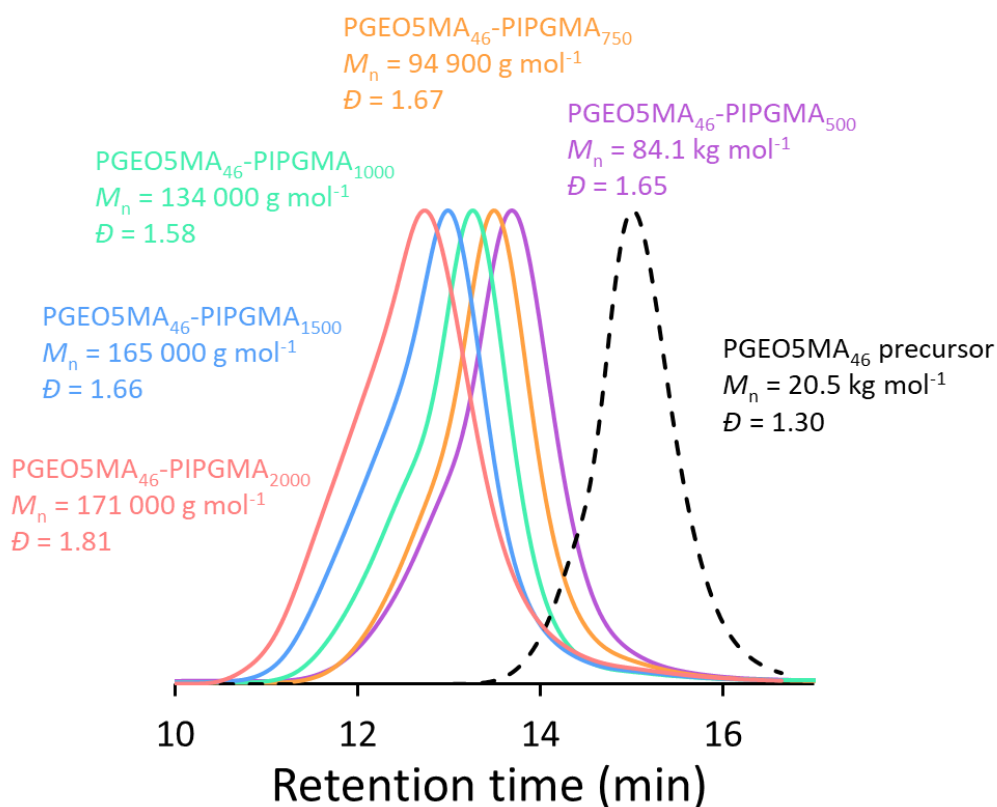

**Figure S3.** DMF GPC curves for a series of PGE05MA<sub>46</sub>-PIPGMA<sub>y</sub> nanoparticles (y = 500–2000).  $M_n$  values are expressed relative to a series of near-monodisperse poly(methyl methacrylate) standards.

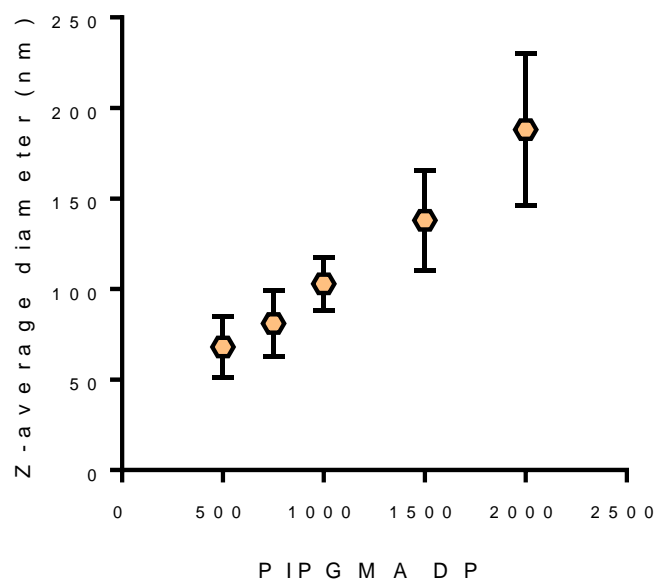

**Figure S4.** Z-average diameter vs. PIPGMA DP determined by DLS studies of a series of PGEO5MA<sub>46</sub>-PIPGMA<sub>y</sub> nanoparticles. Each standard deviation indicates the DLS polydispersity rather than the experimental error.

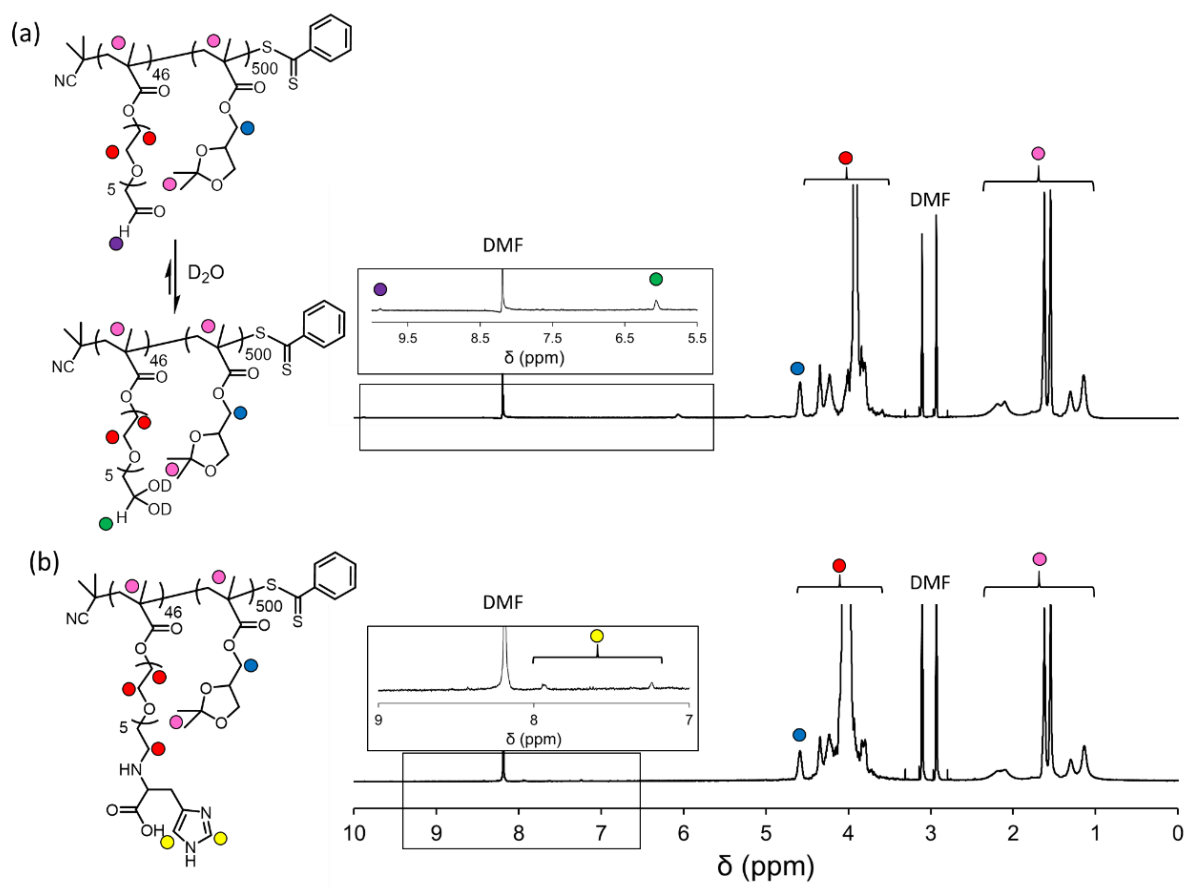

**Figure S5.** <sup>1</sup>H NMR (*d*<sub>7</sub>-DMF) spectra recorded for (a) PAGEO5MA<sub>46</sub>-PIPGMA<sub>500</sub> and (b) PHisGEO5MA<sub>46</sub>-PIPGMA<sub>500</sub>.

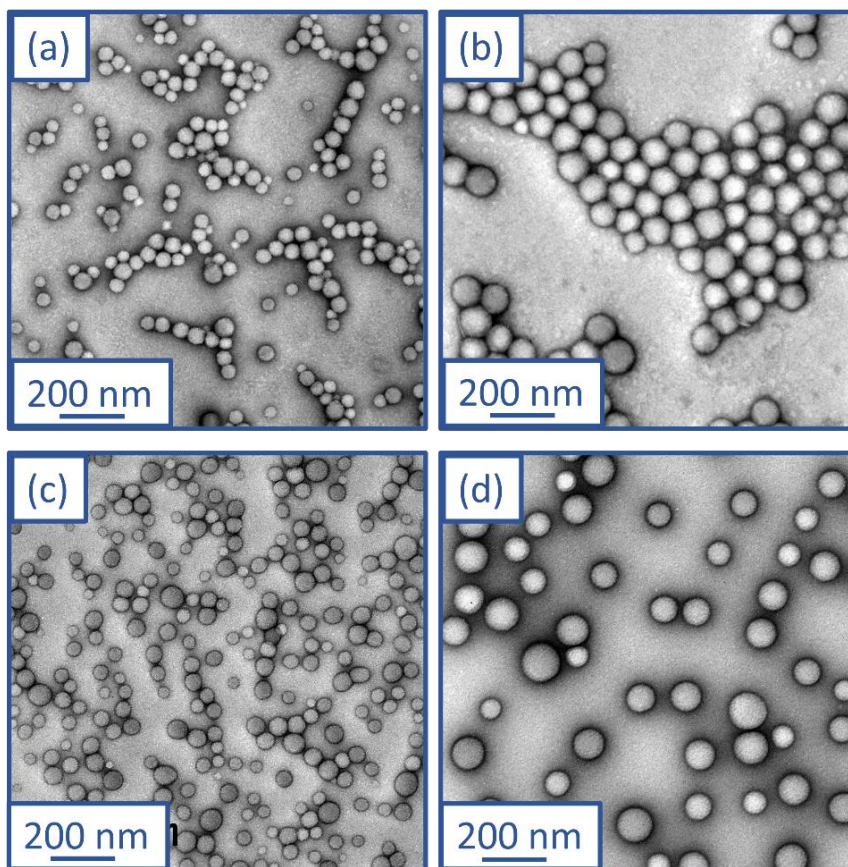

**Figure S6.** TEM images recorded for (a) PAGEO5MA<sub>46</sub>-PIPGMA<sub>500</sub>, (b) PAGEO5MA<sub>46</sub>-PIPGMA<sub>1000</sub>, (c) PHisGEO5MA<sub>46</sub>-PIPGMA<sub>500</sub> and (d) PHisGEO5MA<sub>46</sub>-PIPGMA<sub>1000</sub> nanoparticles.

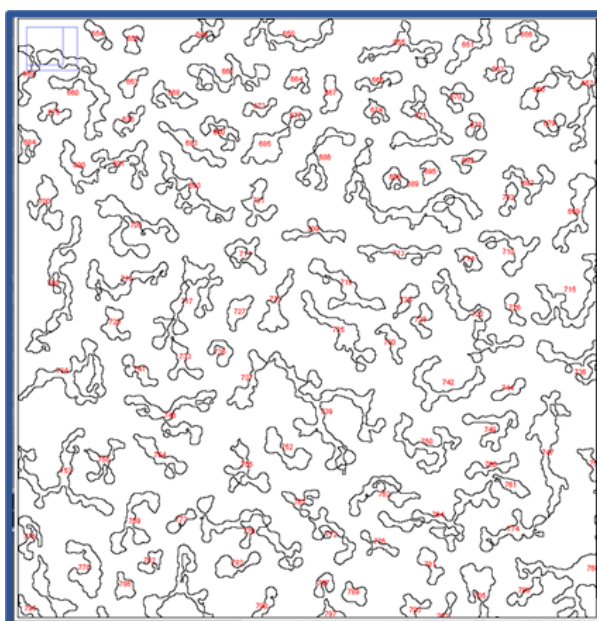

**Figure S7.** Digital image analysis of an SEM image of PHisGEO5MA<sub>46</sub>-PIPGMA<sub>1000</sub> nanoparticles adsorbed onto stainless steel using ImageJ software suggests a fractional surface coverage,  $\theta$ , of 0.23.
